# Supplementary material for: Giardia-specific cellular immune responses in post-giardiasis chronic fatigue syndrome
Source: Springer Nature journal article supplement (doi:10.1186/s12865-017-0190-3), 2017-01-27
Supplement: MOESM1 [file 12025918]

**Supplementary table 1. Cultured PBMC supernatant analysis.**

Analyses of cytokines and soluble CD40L in supernatants of PBMC cultured for 6 days after stimulation with *Giardia* assemblage A and B lysate in persons exposed to this pathogen in the Bergen 2004 outbreak with or without fatigue sequels, and in unexposed controls. Values are pg/mL, median (SD) in stimulated cultures after subtracting measurements in unstimulated cultures. Negative values express higher levels in unstimulated cultures. Complete list of analysed analytes, including also values for *Giardia* assemblage B given in the manuscript.

| Analyte per stimulation agent      | Exposed                         |                       |                           |                               | Unexposed controls (n=10) | p-values                           |                                                    |
|------------------------------------|---------------------------------|-----------------------|---------------------------|-------------------------------|---------------------------|------------------------------------|----------------------------------------------------|
|                                    | No PI-fatigue controls (n = 19) | PI-CFS & ICF (n = 19) | Fatigue other cause (n=9) | Recovered from fatigue (n=10) |                           | Exposed (n=56) vs unexposed (n=10) | No PI-fatigue controls (n=19) vs PI-CFS/ICF (n=19) |
| <i>Giardia ass A</i>               | n=20                            | n=19                  | n=8                       | n=9                           | n=10                      |                                    |                                                    |
| IL-1b                              | 8.3 (68.4)                      | 3.3 (28.9)            | 5.9 (19.3)                | 13.3 (266)                    | 1.7 (115)                 | 0.031                              | ns*                                                |
| IL-4                               | 2.1 (6.1)                       | 0.0 (4.8)             | 0.0 (7.9)                 | 0.8 (5.4)                     | 2.7 (30.1)                | 0.420                              | ns*                                                |
| IL-6                               | 535 (2539)                      | 233 (629)             | 289 (685)                 | 752 (12866)                   | 129 (5444)                | 0.058                              | ns*                                                |
| IL-10                              | 21.3 (15.9)                     | 18.9 (18.8)           | 27.7 (10.3)               | 26.4 (41.4)                   | 13.4 (49.2)               | 0.131                              | ns*                                                |
| IFNy                               | 913 (5221)                      | 601 (4973)            | 1364 (2354)               | 3401 (2971)                   | 153 (967)                 | 0.020                              | ns*                                                |
| sCD40L                             | 31.5 (34.4)                     | 43.3 (51.0)           | 46.8 (20.8)               | 46.0 (26.6)                   | 11.6 (49.5)               | 0.005                              | ns*                                                |
| TNFa                               | 281 (493)                       | 174 (373)             | 520 (422)                 | 525 (1019)                    | 110 (212)                 | 0.017                              | ns*                                                |
| IL-2                               | 0.0 (14.5)                      | 0.0 (5.8)             | 1.4 (3.7)                 | -0.6 (5.1)                    | 2.0 (6.8)                 | 0.388                              | ns*                                                |
| IL-9                               | 1.6 (25.2)                      | 3.0 (36.0)            | 5.1 (10.3)                | 9.4 (26.7)                    | 0.4 (145)                 | 0.442                              | ns*                                                |
| IL-13                              | 244 (236)                       | 135 (181)             | 270 (275)                 | 233 (156)                     | 84 (223)                  | 0.061                              | ns*                                                |
| GMCSF                              | 9.4 (142)                       | 0.0 (74.2)            | 12.4 (49.7)               | 30.1 (153)                    | 0.0 (78.8)                | 0.177                              | ns*                                                |
| MIPa                               | 122 (622)                       | 56.5 (619)            | 196 (412)                 | 420 (478)                     | 31.1 (526)                | 0.217                              | ns*                                                |
| MIPb                               | 1796 (1359)                     | 1465 (1968)           | 1592 (658)                | 2505 (1305)                   | 442 (1983)                | 0.069                              | ns*                                                |
| TGFb1                              | 9.2 (2440)                      | -98.2 (2726)          | -1817 (1481)              | -1743 (3510)                  | -117 (1412)               | 0.468                              | ns*                                                |
| TGFb2                              | 6.8 (66.0)                      | 21.6 (50.3)           | -77.4 (78.2)              | 0.9 (72.6)                    | -34.6 (68.2)              | 0.422                              | ns*                                                |
| TGFb3                              | 9.4 (20.5)                      | -0.7 (19.3)           | -8.2 (17.8)               | -20.4 (31.1)                  | 14.3 (299)                | 0.076                              | ns*                                                |
| <i>Giardia ass B</i>               | n=20                            | n=19                  | n=8                       | n=9                           | n=10                      |                                    |                                                    |
| IL-1b                              | 8.4 (63.5)                      | 23.7 (211)            | 10.0 (37.0)               | 37.3 (207)                    | 0.8 (8.8)                 | <0.001                             | ns*                                                |
| IL-4                               | 4.1 (6.6)                       | 4.9 (4.8)             | -0.7 (7.4)                | 7.7 (5.6)                     | 4.0 (29.4)                | 0.838                              | ns*                                                |
| IL-6                               | 496 (8364)                      | 781 (18566)           | 957 (659)                 | 741 (991)                     | 85.3 (310)                | <0.001                             | ns*                                                |
| IL-10                              | 19.7 (23.3)                     | 25.2 (354)            | 22.7 (13.2)               | 25.1 (5.9)                    | 7.1 (25.3)                | <0.001                             | ns*                                                |
| IFNy                               | 1009 (3656)                     | 1627 (4637)           | 775 (2569)                | 2577 (2322)                   | 31.6 (956)                | <0.001                             | ns*                                                |
| sCD40L                             | 7.5 (25.0)                      | 35.6 (59.0)           | 26.6 (27.3)               | 19.5 (53.5)                   | 0.0 (43.2)                | 0.003                              | 0.005                                              |
| TNFa                               | 192 (407)                       | 346 (713)             | 213 (990)                 | 395 (787)                     | 7.6 (166)                 | <0.001                             | ns*                                                |
| IL-2                               | 5.9 (9.3)                       | 7.1 (8.1)             | 15.7 (15.1)               | 6.1 (8.9)                     | 4.7 (4.6)                 | 0.107                              | ns*                                                |
| IL-9                               | 11.7 (39.7)                     | 23.5 (155)            | 20.3 (22.9)               | 23.6 (115)                    | 2.8 (14.5)                | 0.018                              | ns*                                                |
| IL-13                              | 230 (203)                       | 262 (212)             | 248 (371)                 | 441 (272)                     | 72.8 (100)                | 0.002                              | ns*                                                |
| MIPa                               | 51.1 (657)                      | 112 (645)             | 252 (427)                 | 692 (540)                     | 15.5 (399)                | 0.034                              | ns*                                                |
| MIPb                               | 1691 (1856)                     | 2306 (1939)           | 1754 (1618)               | 2862 (4195)                   | 258 (1765)                | 0.034                              | ns*                                                |
| TGFb1                              | -959 (2759)                     | -2083 (2243)          | -1914 (1869)              | -2749 (3429)                  | -3680 (1438)              | 0.033                              | ns*                                                |
| TGFb2                              | -43.2 (61.7)                    | 5.7 (46.4)            | 7.5 (111)                 | 21.0 (45.0)                   | -34.7 (61.1)              | 0.132                              | ns*                                                |
| TGFb                               | 4.7 (23.0)                      | -10.5 (19.3)          | -7.2 (8.3)                | -20.5 (15.3)                  | -10.3 (43.0)              | 0.869                              | ns*                                                |
| <i>Tuberculin (PPD)</i>            | n=16                            | n=14                  | n=8                       | n=8                           | n=9                       |                                    |                                                    |
| IL-1b                              | 171 (494)                       | 123 (422)             | 152 (322)                 | 235 (328)                     | 64.6 (142)                | 0.144                              | ns*                                                |
| IL-4                               | 0.6 (7.9)                       | 0.0 (7.1)             | 0.1 (3.7)                 | 1.2 (4.2)                     | 1.9 (27.6)                | 0.674                              | ns*                                                |
| IL-6                               | 46299 (15478)                   | 43172 (21101)         | 47856 (16730)             | 43910 (16441)                 | 38190 (19503)             | 0.073                              | ns*                                                |
| IL-10                              | 141 (230)                       | 140 (180)             | 134 (66)                  | 112 (228)                     | 61 (156)                  | 0.251                              | ns*                                                |
| IFNy                               | 5696 (7773)                     | 3699 (6334)           | 8921 (5771)               | 9696 (4271)                   | 751 (3774)                | 0.040                              | ns*                                                |
| sCD40L                             | 51.3 (41.9)                     | 68.1 (45.9)           | 110 (108)                 | 86.1 (21.8)                   | 36.1 (35.4)               | 0.027                              | ns*                                                |
| TNFa                               | 841 (2117)                      | 983 (1096)            | 923 (928)                 | 1257 (1527)                   | 417 (596)                 | 0.106                              | ns*                                                |
| IL-2                               | 0.0 (5.3)                       | 0.0 (7.1)             | 0.5 (6.2)                 | -3.8 (8.5)                    | 0.0 (10.3)                | 0.258                              | ns*                                                |
| IL-9                               | 41.9 (84.2)                     | 125 (212)             | 94.0 (192)                | 68.5 (407)                    | 42.7 (307)                | 0.587                              | ns*                                                |
| IL-13                              | 183 (200)                       | 287 (427)             | 197 (169)                 | 165 (90.6)                    | 157 (647)                 | 0.837                              | ns*                                                |
| GMCSF                              | 107 (156)                       | 251 (670)             | 185 (165)                 | 164 (134)                     | 60 (2032)                 | 0.783                              | ns*                                                |
| MIPb                               | 3872 (2450)                     | 3769 (1893)           | 4863 (2265)               | 3652 (29230)                  | 4092 (1984)               | 0.820                              | ns*                                                |
| <i>S. typhi lipopolysaccharide</i> | n=14                            | n=12                  | n=7                       | n=8                           | n=10                      |                                    |                                                    |
| IL-1b                              | 1465 (1142)                     | 1330 (1220)           | 1172 (964)                | 1101 (910)                    | 1176 (2385)               | 0.650                              | ns*                                                |
| IL-4                               | 9.3 (96.0)                      | 10.1 (20.2)           | 0.0 (10.8)                | 0.0 (36.2)                    | 0.0 (26.0)                | 0.443                              | ns*                                                |
| IL-6                               | 255061 (95719)                  | 224751 (106951)       | 248922 (28293)            | 242734 (48587)                | 217929 (95593)            | 0.226                              | ns*                                                |
| IL-10                              | 537 (521)                       | 457 (628)             | 358 (315)                 | 471 (847)                     | 715 (1598)                | 0.385                              | ns*                                                |
| IL-17A                             | 2085 (6274)                     | 547 (4335)            | 2854 (2242)               | 3358 (4706)                   | 990 (1637)                | 0.199                              | ns*                                                |
| IL-22                              | 441 (1105)                      | 0.0 (827)             | 0.0 (224)                 | 773 (633)                     | 0.0 (543)                 | 0.287                              | ns*                                                |
| IFNy                               | 38092 (33960)                   | 10727 (19170)         | 24174 (16386)             | 37961 (28876)                 | 6341 (18285)              | 0.288                              | ns*                                                |
| sCD40L                             | 525 (557)                       | 231 (417)             | 141 (351)                 | 487 (279)                     | 305 (566)                 | 0.932                              | ns*                                                |
| TNFa                               | 1852 (1161)                     | 3143 (2427)           | 1745 (894)                | 2537 (3840)                   | 1864 (5324)               | 0.618                              | ns*                                                |
| IL-2                               | 4.7 (1427)                      | 0.0 (84.7)            | 11.0 (11.4)               | 27.6 (39.3)                   | 0.0 (69.1)                | 0.249                              | ns*                                                |
| IL-9                               | 126 (781)                       | 25.1 (718)            | 31.7 (227)                | 321 (465)                     | 44.1 (157)                | 0.403                              | ns*                                                |
| IL-13                              | 235 (941)                       | 113 (721)             | 73.0 (275)                | 346 (650)                     | 132 (316)                 | 0.309                              | ns*                                                |
| GMCSF                              | 343 (919)                       | 250 (988)             | 296 (140)                 | 455 (422)                     | 193 (301)                 | 0.314                              | ns*                                                |
| MIPb                               | 22750 (24459)                   | 4626 (24025)          | 41757 (26924)             | 18875 (34739)                 | 10172 (20709)             | 0.367                              | ns*                                                |

\* KruskalWallis test across all exposed groups was not significant (below p=0.05). ns= not significant
